# Supplementary material for: Step-economic, efficient, ZnS nanoparticle-catalyzed synthesis of spirooxindole derivatives in aqueous medium via Knoevenagel condensation followed by Michael addition
Source: Royal Society of Chemistry journal article supplement (doi:10.1039/c1gc15244k), 2011-01-01
Supplement: c1gc15244k.pdf [file c1gc15244k.pdf]

**Step economic, efficient, ZnS nanoparticle catalyzed synthesis of spirooxindole derivatives in aqueous medium via Knoevenagel condensation followed by Michael addition**

Anshu Dandia,\*<sup>a</sup> Vijay Parewa<sup>a</sup>, Anuj Kumar Jain<sup>a</sup>, Kuldeep S. Rathore<sup>b</sup>

<sup>a</sup>Centre of Advanced Studies, Department of Chemistry,  
University of Rajasthan, Jaipur-302004, India

<sup>b</sup>Amity School of Engineering, Amity University Rajasthan, Jaipur, India  
E-mail: [dranshudandia@yahoo.co.in](mailto:dranshudandia@yahoo.co.in)

**Supporting Information**

| <b>Contents:</b>                                       | <b>Page No.</b> |
|--------------------------------------------------------|-----------------|
| 1. XRD patterns of ZnS nanoparticles                   | 2               |
| 2. TEM image of ZnS nanoparticles                      | 2               |
| 3. EDAX pattern of ZnS nanoparticles                   | 3               |
| 4. <sup>1</sup> H NMR Spectrum of compound <b>5a</b>   | 4               |
| 5. <sup>13</sup> C NMR Spectrum of compound <b>5a</b>  | 5               |
| 6. <sup>1</sup> H NMR Spectrum of compound <b>5b</b>   | 6               |
| 7. <sup>13</sup> C NMR Spectrum of compound <b>5b</b>  | 7               |
| 8. <sup>1</sup> H NMR Spectrum of compound <b>5c</b>   | 8               |
| 9. <sup>13</sup> C NMR Spectrum of compound <b>5c</b>  | 9               |
| 10. <sup>13</sup> C NMR Spectrum of compound <b>5d</b> | 10              |
| 11. <sup>1</sup> H NMR Spectrum of compound <b>5f</b>  | 11              |
| 12. <sup>13</sup> C NMR Spectrum of compound <b>5f</b> | 12              |
| 13. <sup>1</sup> H NMR Spectrum of compound <b>7h</b>  | 13              |
| 14. <sup>13</sup> C NMR Spectrum of compound <b>7h</b> | 14              |
| 15. <sup>1</sup> H NMR Spectrum of compound <b>7g</b>  | 15              |
| 16. <sup>13</sup> C NMR Spectrum of compound <b>7g</b> | 16              |
| 17. Mass spectrum of compound <b>5a</b>                | 17              |
| 18. Mass spectrum of compound <b>7h</b>                | 18              |

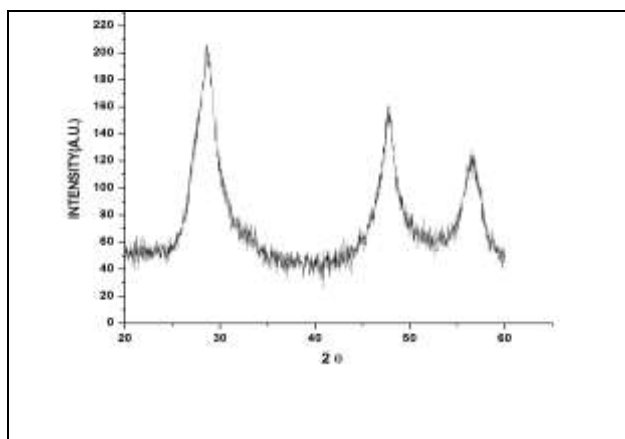

Fig.2: XRD patterns of ZnS nanoparticles

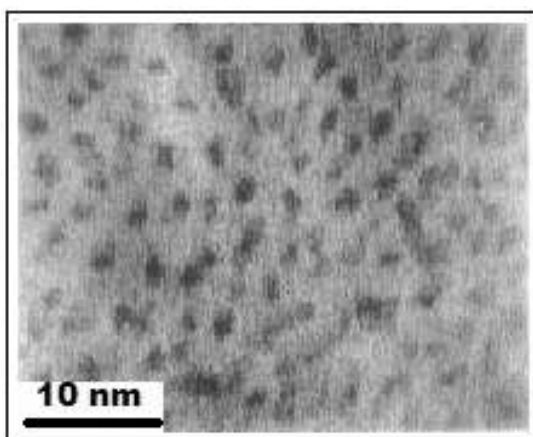

Fig.3a: TEM image of ZnS nanoparticles

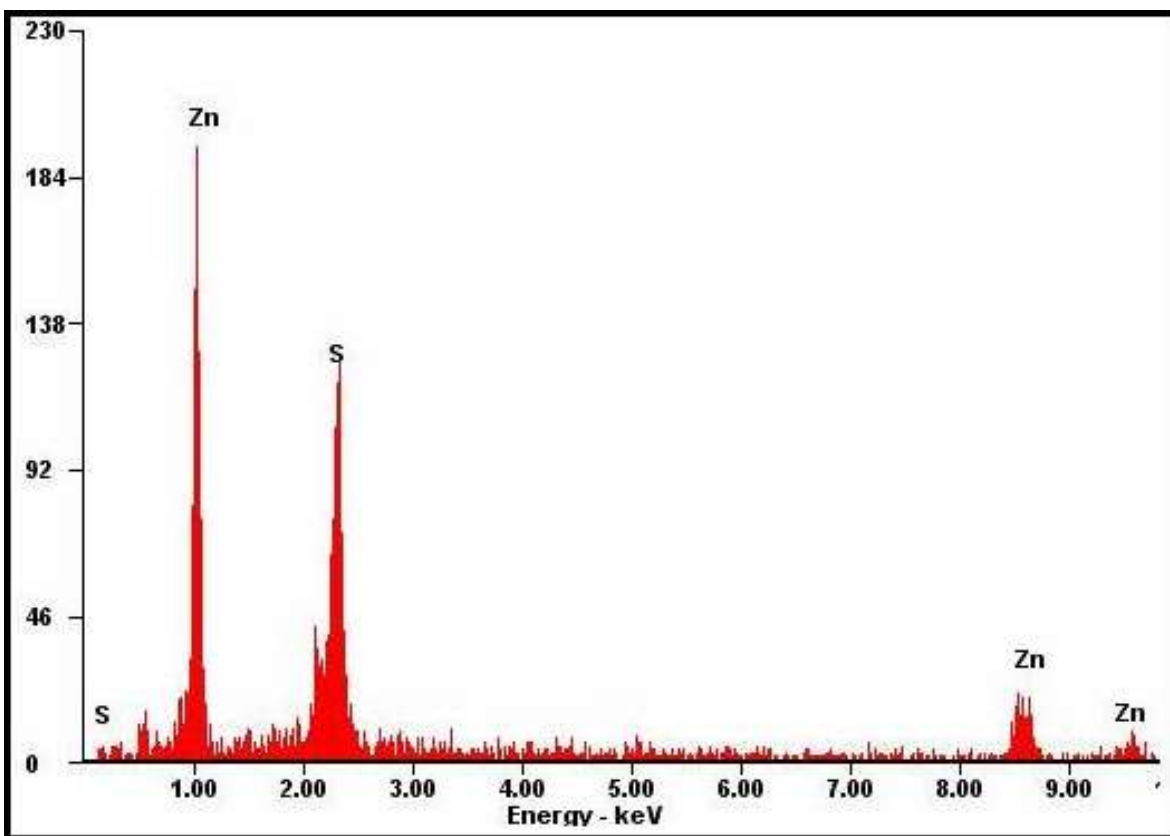

Fig. 5: EDAX pattern of ZnS nanoparticles

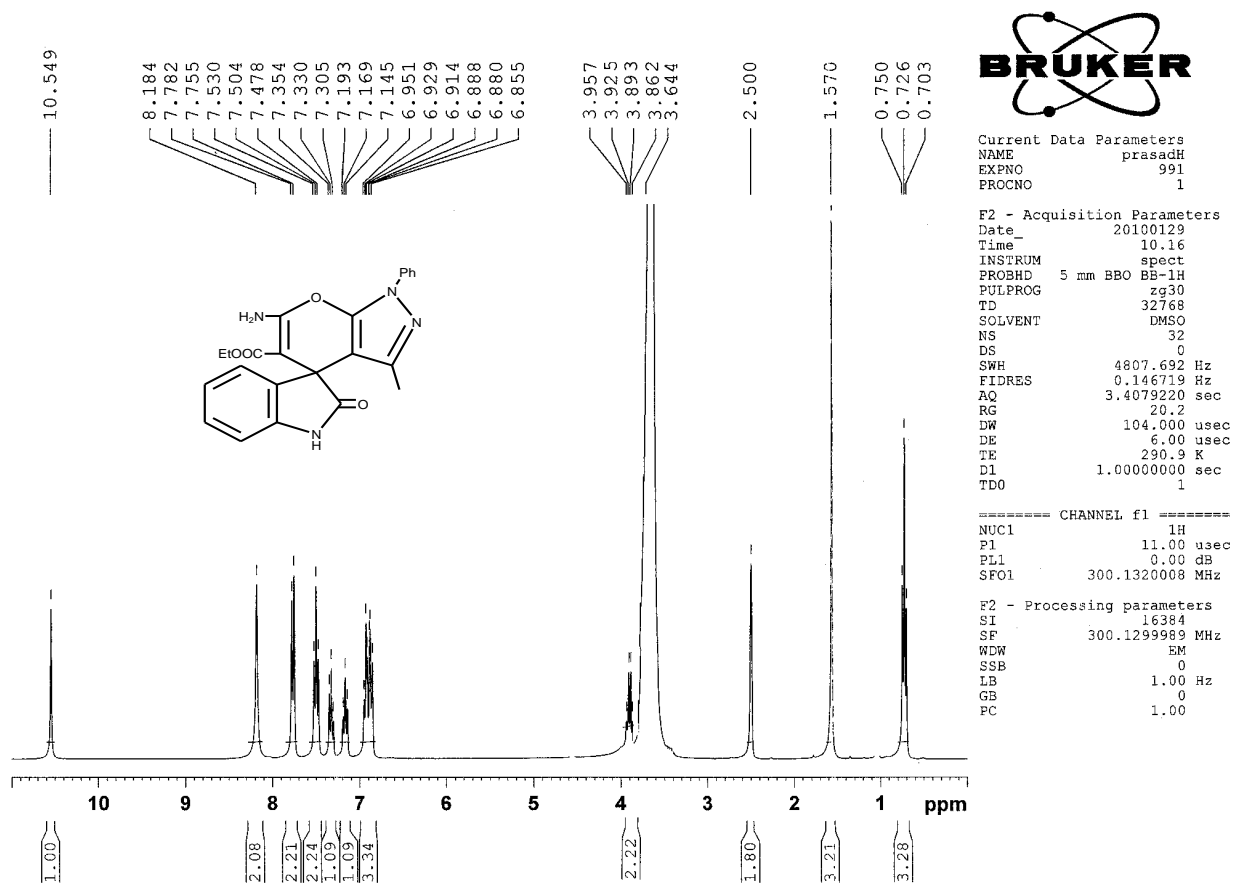

<sup>1</sup>H NMR Spectrum of compound 5a

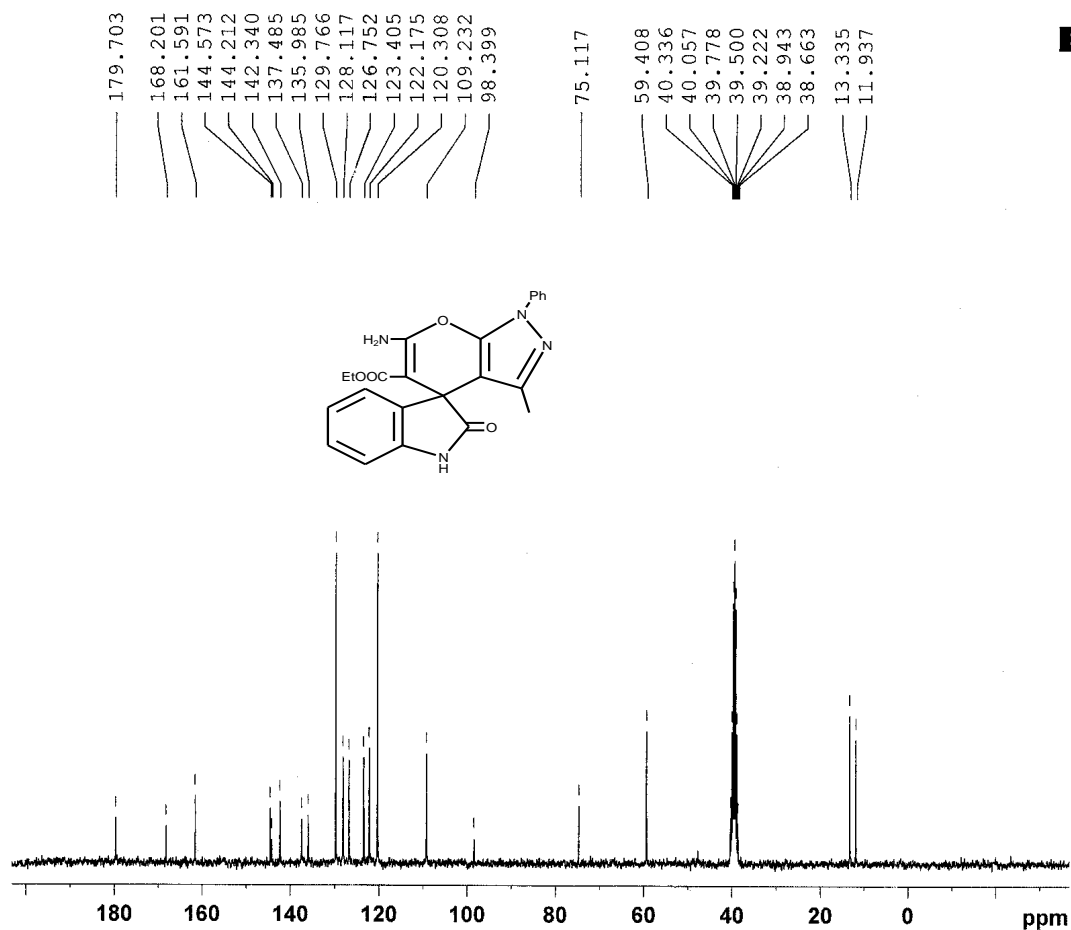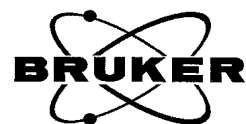

Current Data Parameters  
 NAME prasad C  
 EXPNO 267  
 PROCNO 1

F2 - Acquisition Parameters  
 Date 20100129  
 Time 10.22  
 INSTRUM spect  
 PROBHD 5 mm BBO BB-1H  
 PULPROG zgpg  
 TD 32768  
 SOLVENT DMSO  
 NS 630  
 DS 4  
 SWH 18115.941 Hz  
 FIDRES 0.552855 Hz  
 AQ 0.9044468 sec  
 RG 90.5  
 DW 27.600 usec  
 DE 6.00 usec  
 TE 290.7 K  
 D1 1.00000000 sec  
 d11 0.03000000 sec  
 DELTA 0.89999998 sec  
 TDO 1

==== CHANNEL f1 =====  
 NUC1 13C  
 P1 9.20 usec  
 PL1 -1.00 dB  
 SFO1 75.4740505 MHz

==== CHANNEL f2 =====  
 CPDPRG2 waltz16  
 NUC2 1H  
 PCPD2 80.00 usec  
 PL12 17.20 dB  
 PL13 20.20 dB  
 PL2 0.00 dB  
 SFO2 300.1315007 MHz

F2 - Processing parameters  
 SI 131072  
 SF 75.4677614 MHz  
 WDW EM  
 SSB 0  
 LB 3.00 Hz  
 GB 0  
 PC 1.40

<sup>13</sup>C NMR Spectrum of compound 5a

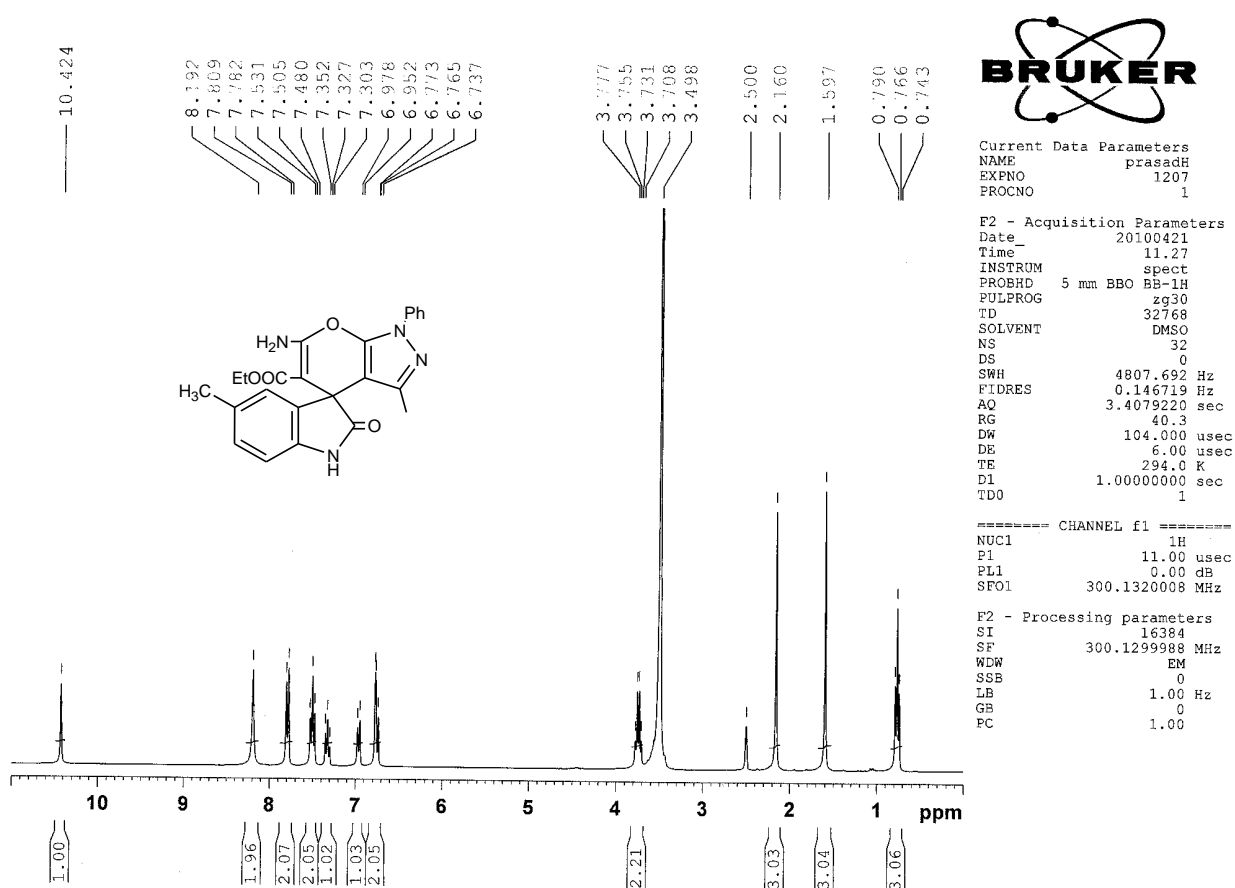

<sup>1</sup>H NMR Spectrum of compound **5b**

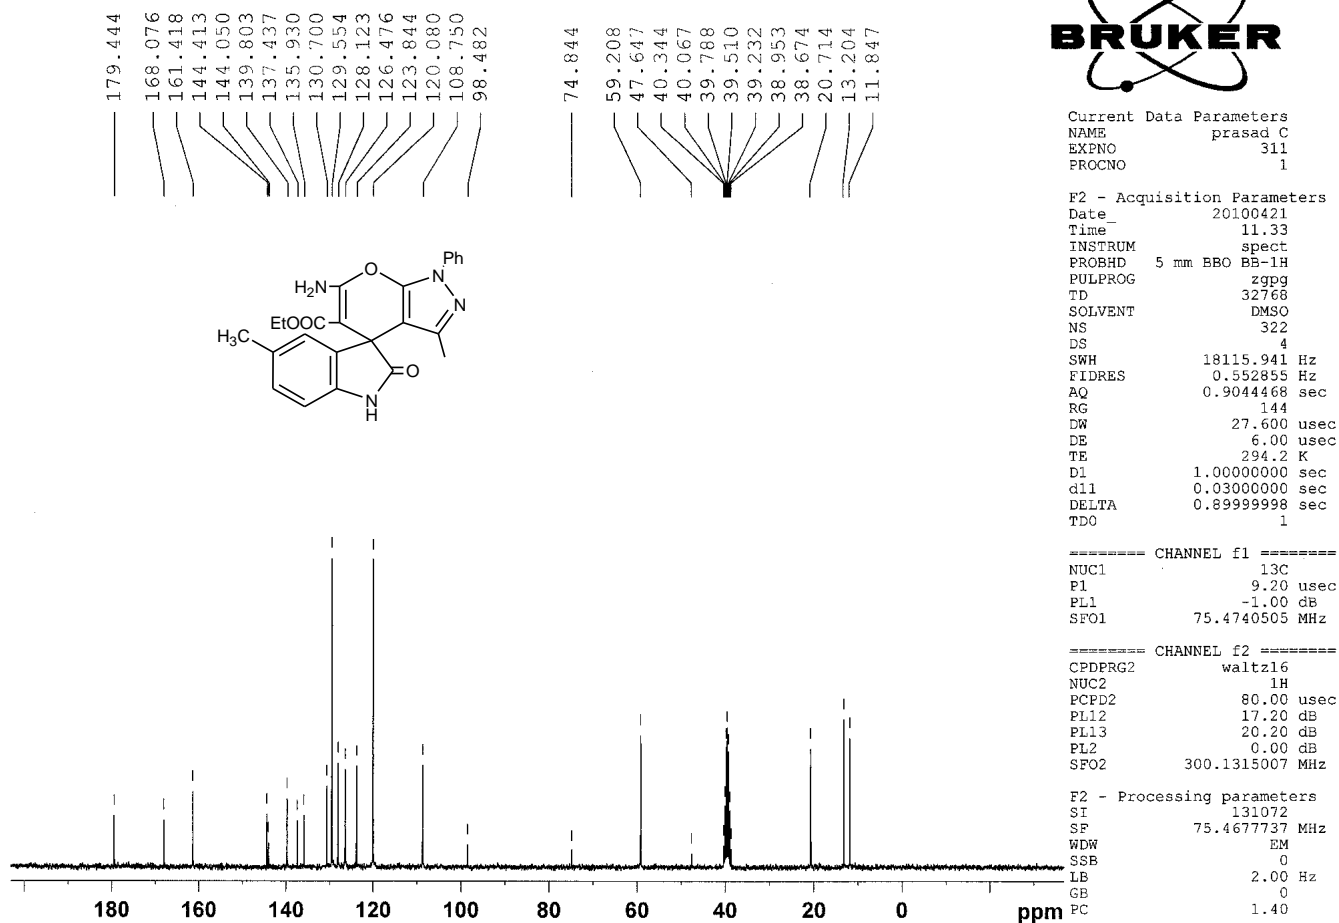

<sup>13</sup>C NMR Spectrum of compound 5b

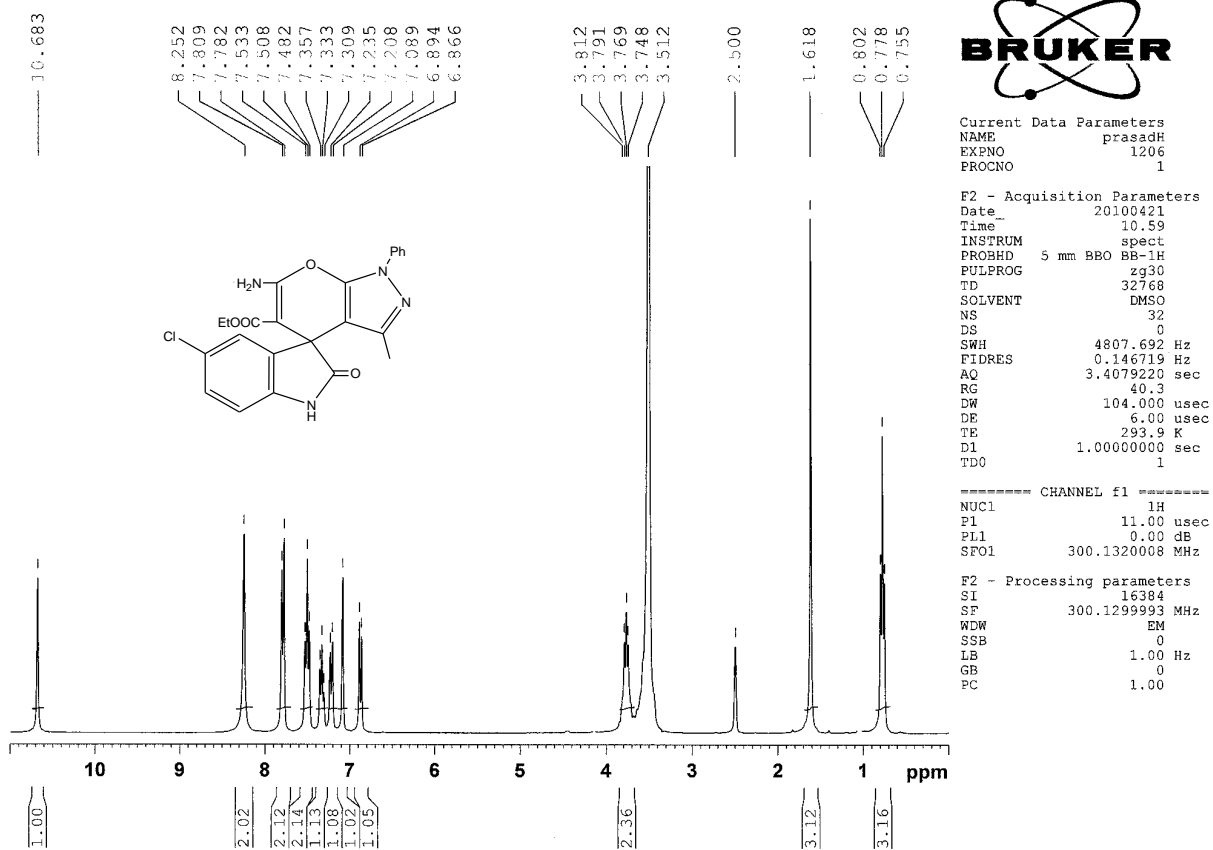

<sup>1</sup>H NMR Spectrum of compound 5c



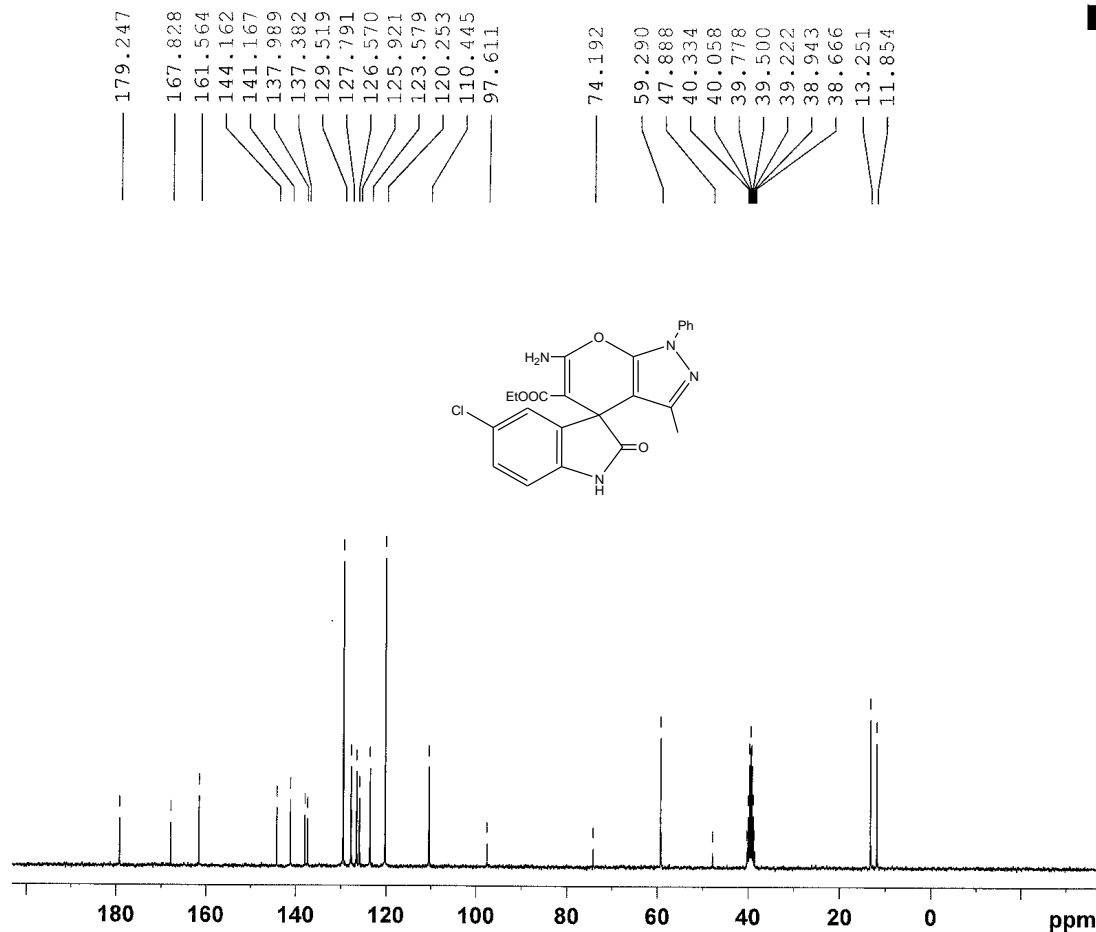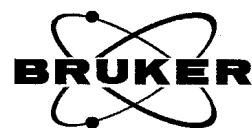

Current Data Parameters  
NAME prasad C  
EXPO 310  
PROCNO 1

F2 - Acquisition Parameters  
Date\_ 20100421  
Time 11.05  
INSTRUM spect  
PROBHD 5 mm BBO BB-1H  
PULPROG zgpg  
TD 32768  
SOLVENT DMSO  
NS 553  
DS 4  
SWH 18115.941 Hz  
FIDRES 0.552855 Hz  
AQ 0.9044468 sec  
RG 144  
DW 27.600 usec  
DE 6.00 usec  
TE 293.9 K  
D1 1.0000000 sec  
d11 0.0300000 sec  
DELTA 0.89999998 sec  
TDO 1

===== CHANNEL f1 =====  
NUC1 13C  
P1 9.20 usec  
PL1 -1.00 dB  
SFO1 75.4740505 MHz

===== CHANNEL f2 =====  
CPDPRG2 waltz16  
NUC2 1H  
PCPD2 80.00 usec  
PL12 17.20 dB  
PL13 20.20 dB  
PL2 0.00 dB  
SFO2 300.1315007 MHz

F2 - Processing parameters  
SI 131072  
SF 75.4677742 MHz  
WDW EM  
SSB 0  
LB 2.00 Hz  
GB 0  
PC 1.40

<sup>13</sup>C NMR Spectrum of compound 5c

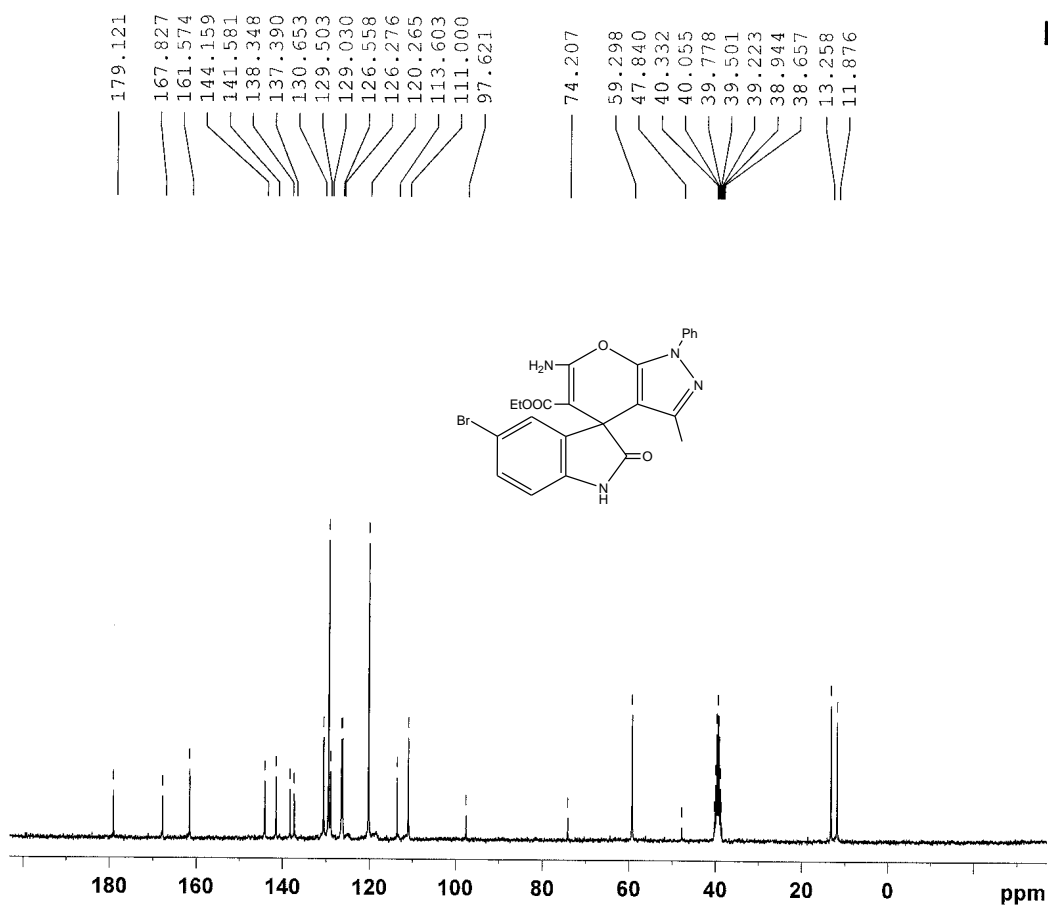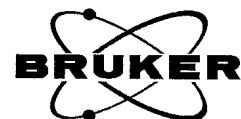

Current Data Parameters  
NAME prasad C  
EXPNO 312  
PROCNO 1

F2 - Acquisition Parameters  
Date\_ 20100421  
Time 11.49  
INSTRUM spect  
PROBHD 5 mm BBO BB-1H  
PULPROG zgpg  
TD 32768  
SOLVENT DMSO  
NS 903  
DS 4  
SWH 18115.941 Hz  
FIDRES 0.552855 Hz  
AQ 0.9044468 sec  
RG 144  
DW 27.600 usec  
DE 6.00 usec  
TE 293.9 K  
D1 1.0000000 sec  
d11 0.0300000 sec  
DELTA 0.89999998 sec  
TD0 1

----- CHANNEL f1 -----  
NUC1 13C  
P1 9.20 usec  
PL1 -1.00 dB  
SFO1 75.4740505 MHz

----- CHANNEL f2 -----  
CPDPRG2 waltz16  
NUC2 1H  
PCPD2 80.00 usec  
PL12 17.20 dB  
PL13 20.20 dB  
PL2 0.00 dB  
SFO2 300.1315007 MHz

F2 - Processing parameters  
SI 131072  
SF 75.4677754 MHz  
WDW EM  
SSB 0  
LB 2.00 Hz  
GB 0  
PC 1.40

<sup>13</sup>C NMR Spectrum of compound 5d

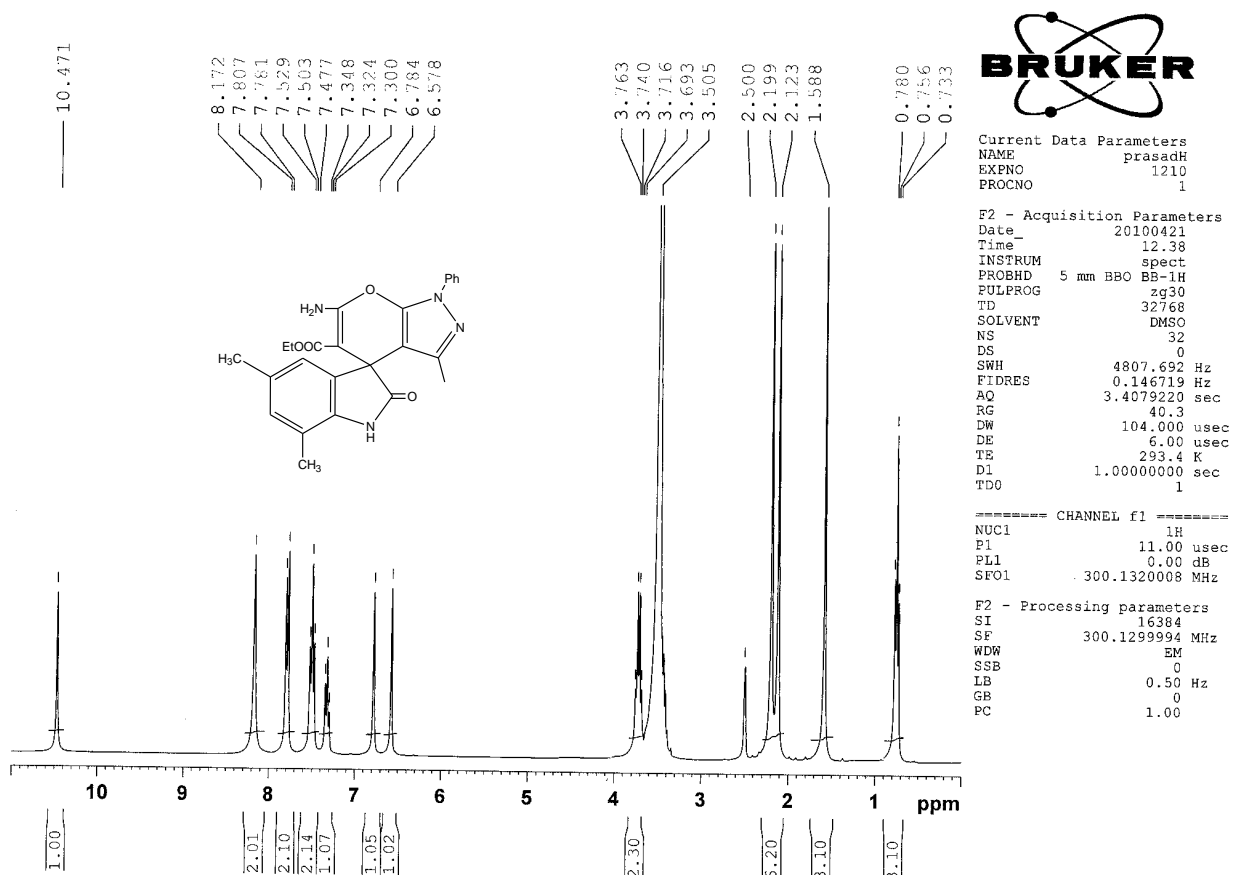

<sup>1</sup>H NMR Spectrum of compound **5f**

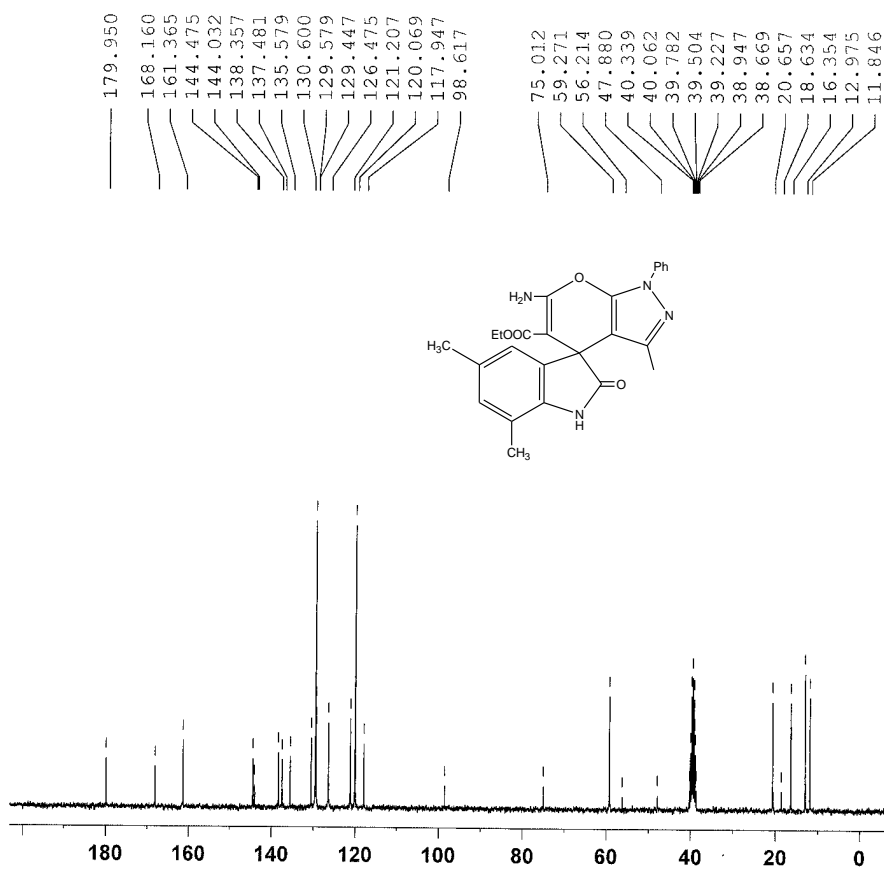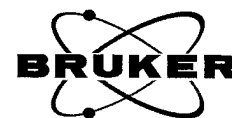

Current Data Parameters  
 NAME prasad C  
 EXPNO 313  
 PROCNO 1

F2 - Acquisition Parameters  
 Date\_ 20100421  
 Time 12.43  
 INSTRUM spect  
 PROBHD 5 mm BBO BB-1H  
 PULPROG zgpg  
 TD 32768  
 SOLVENT DMSO  
 NS 357  
 DS 4  
 SWH 18115.941 Hz  
 FIDRES 0.552855 Hz  
 AQ 0.9044468 sec  
 RG 144  
 DW 27.600 usec  
 DE 6.00 usec  
 TE 293.7 K  
 D1 1.00000000 sec  
 d11 0.03000000 sec  
 DELTA 0.89999998 sec  
 TDO 1

===== CHANNEL f1 =====  
 NUC1 13C  
 P1 9.20 usec  
 PL1 -1.00 dB  
 SFO1 75.4740505 MHz

===== CHANNEL f2 =====  
 CPDPRG2 waltz16  
 NUC2 1H  
 PCPD2 80.00 usec  
 PL12 17.20 dB  
 PL13 20.20 dB  
 PL2 0.00 dB  
 SFO2 300.1315007 MHz

F2 - Processing parameters  
 SI 131072  
 SF 75.4677718 MHz  
 WDW EM  
 SSB 0  
 LB 2.00 Hz  
 GB 0  
 PC 1.40

### $^{13}\text{C}$ NMR Spectrum of compound **5f**

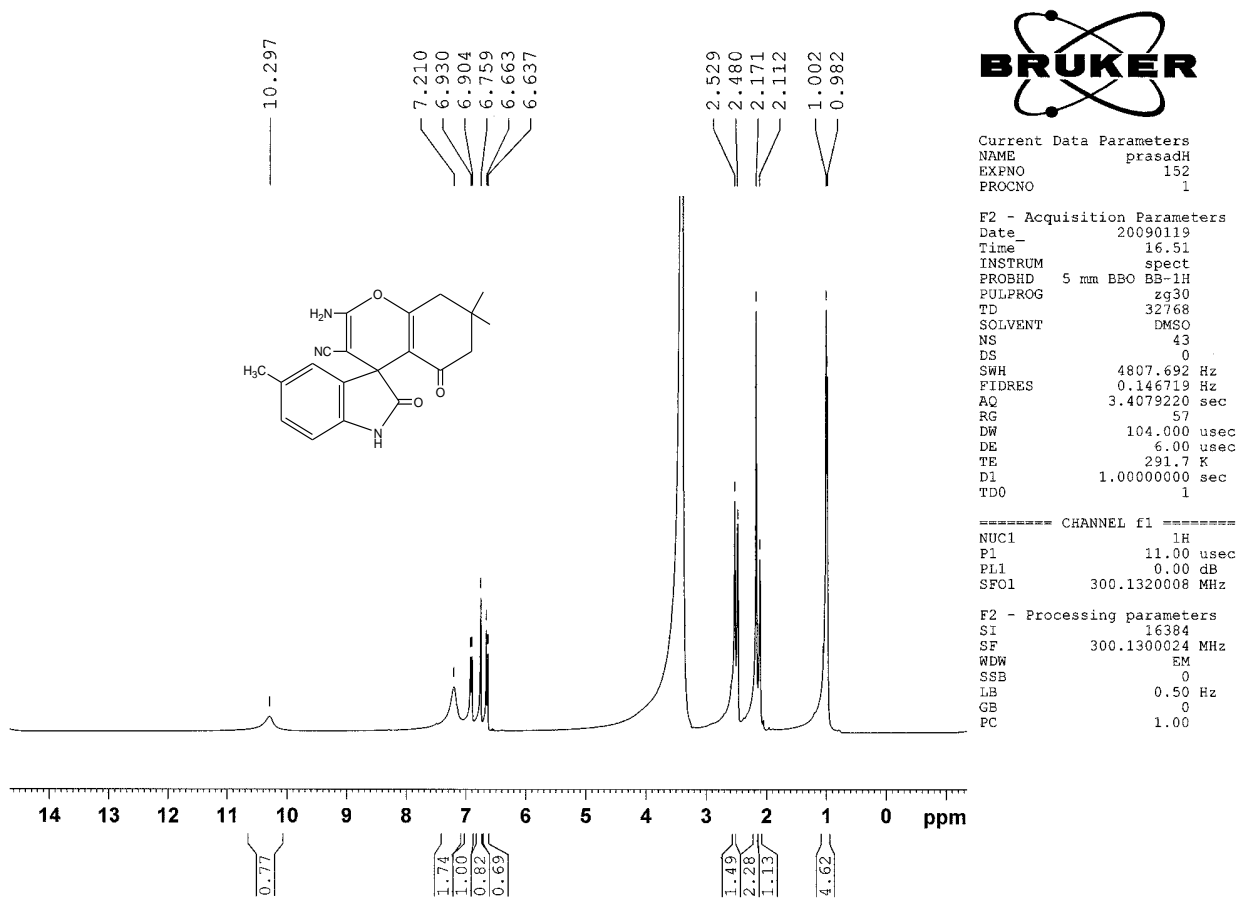

### $^1\text{H}$ NMR Spectrum of compound **7h**

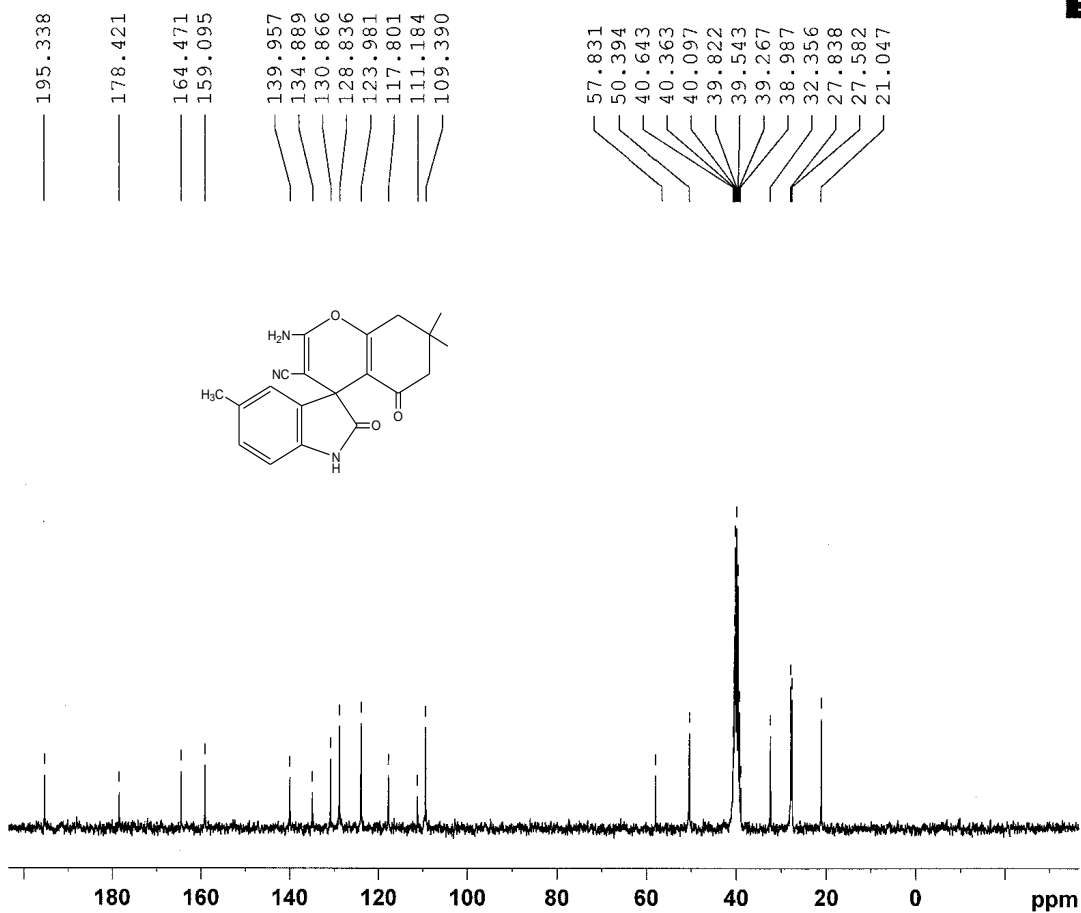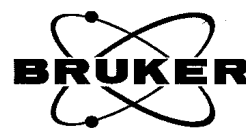

Current Data Parameters  
 NAME prasad C  
 EXPNO 78  
 PROCNO 1

F2 - Acquisition Parameters  
 Date 20090119  
 Time 17.00  
 INSTRUM spect  
 PROBHD 5 mm BBO BB-1H  
 PULPROG zgpg  
 TD 32768  
 SOLVENT DMSO  
 NS 1037  
 DS 4  
 SWH 18115.941 Hz  
 FIDRES 0.552855 Hz  
 AQ 0.9044468 sec  
 RG 203  
 DW 27.600 usec  
 DE 6.00 usec  
 TE 292.6 K  
 D1 1.00000000 sec  
 d11 0.03000000 sec  
 DELTA 0.89999998 sec  
 TDO 1

===== CHANNEL f1 =====  
 NUC1 13C  
 P1 9.20 usec  
 PL1 -1.00 dB  
 SFO1 75.4740505 MHz

===== CHANNEL f2 =====  
 CPDPRG2 waltz16  
 NUC2 1H  
 FCPD2 80.00 usec  
 PL12 17.20 dB  
 PL13 20.20 dB  
 PL2 0.00 dB  
 SFO2 300.1315007 MHz

F2 - Processing parameters  
 SI 131072  
 SF 75.4677536 MHz  
 WDW EM  
 SSB 0  
 LB 3.00 Hz  
 GB 0  
 PC 1.40

<sup>13</sup>C NMR Spectrum of compound 7h

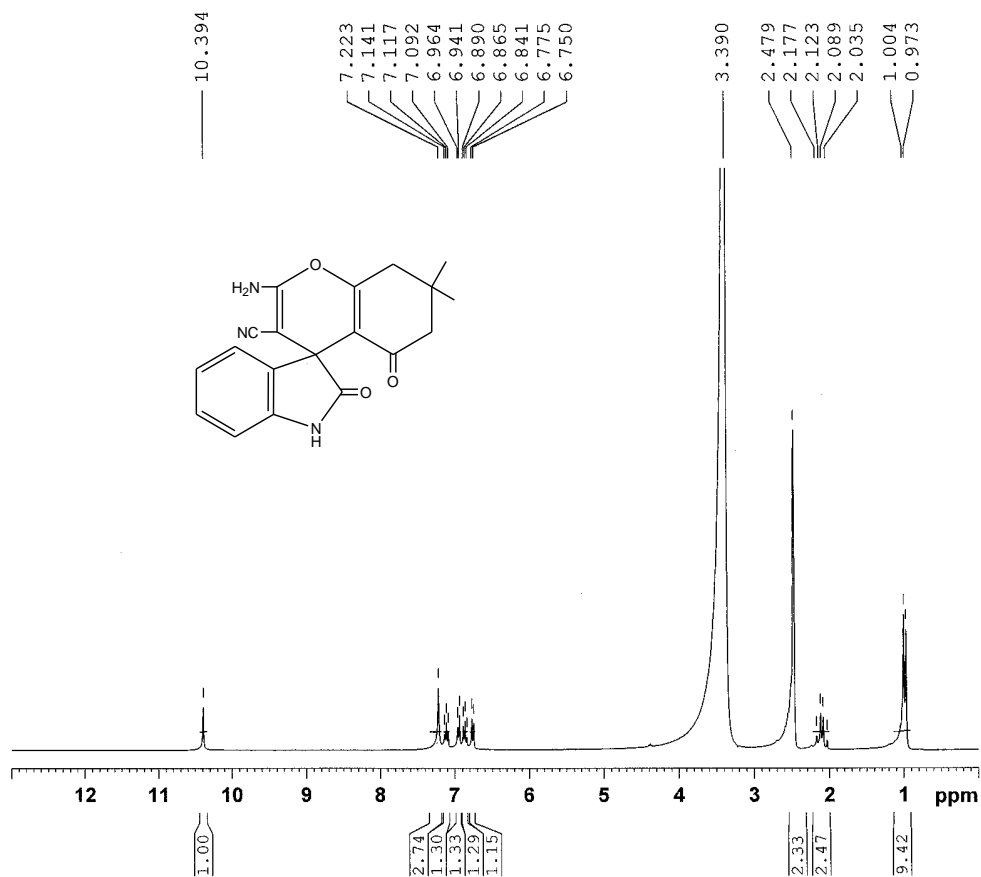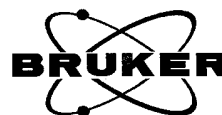

Current Data Parameters  
 NAME prasadH  
 EXPNO 154  
 PROCNO 1

F2 - Acquisition Parameters  
 Date\_ 20090120  
 Time 11.53  
 INSTRUM spect  
 PROBHD 5 mm BBO BB-1H  
 PULPROG zg30  
 TD 32768  
 SOLVENT DMSO  
 NS 100  
 DS 0  
 SWH 4807.692 Hz  
 FIDRES 0.146719 Hz  
 AQ 3.4079220 sec  
 RG 128  
 DW 104.000 usec  
 DE 6.00 usec  
 TE 291.6 K  
 D1 1.0000000 sec  
 TD0 1

===== CHANNEL f1 =====  
 NUC1 1H  
 P1 11.00 usec  
 PL1 0.00 dB  
 SFO1 300.1320008 MHz

F2 - Processing parameters  
 SI 16384  
 SF 300.1300024 MHz  
 WDW EM  
 SSB 0  
 LB 1.00 Hz  
 GB 0  
 PC 1.00

### <sup>1</sup>H NMR Spectrum of compound 7g

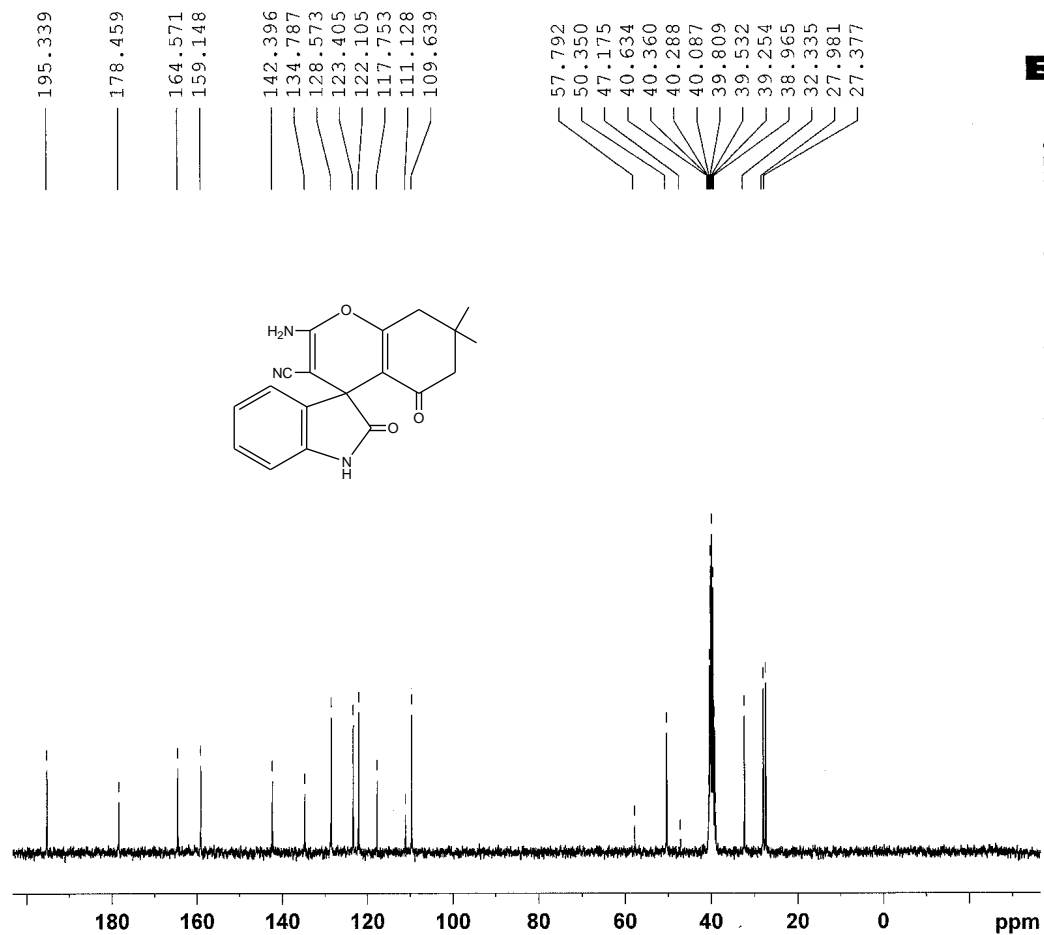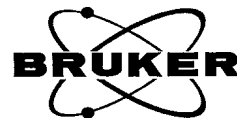

Current Data Parameters  
NAME prasad C  
EXPNO 79  
PROCNO 1

F2 - Acquisition Parameters  
Date\_ 20090120  
Time 12.19  
INSTRUM spect  
PROBHD 5 mm BBO BB-1H  
PULPROG zgpg  
TD 32768  
SOLVENT DMSO  
NS 1048  
DS 4  
SWH 18115.941 Hz  
FIDRES 0.552855 Hz  
AQ 0.9044468 sec  
RG 203  
DW 27.600 usec  
DE 6.00 usec  
TE 291.5 K  
D1 1.00000000 sec  
d11 0.03000000 sec  
DELTA 0.89999998 sec  
TD0 1

===== CHANNEL f1 =====  
NUC1 13C  
P1 9.20 usec  
PL1 -1.00 dB  
SFO1 75.4740505 MHz

===== CHANNEL f2 =====  
CPDPRG2 waltz16  
NUC2 1H  
PCPD2 80.00 usec  
PL12 17.20 dB  
PL13 20.20 dB  
PL2 0.00 dB  
SFO2 300.1315007 MHz

F2 - Processing parameters  
SI 131072  
SF 75.4677536 MHz  
WDW EM  
SSB 0  
LB 2.00 Hz  
GB 0  
PC 1.40



### $^{13}\text{C}$ NMR Spectrum of compound **7g**

[ Mass Spectrum ]  
Data : 9E01JUNE006  
Sample: A-1 DR ANSHU DANDIA RAJ UNIV JAIPUR #3941  
Note : -  
Inlet : Direct Ion Mode : FAB+  
Spectrum Type : Normal Ion [MF-Linear]  
RT : 0.12 min Scan# : 2  
BP : m/z 416.0000 Int. : 99.08  
Output m/z range : 86.2747 to 514.6563 Cut Level : 0.00 %

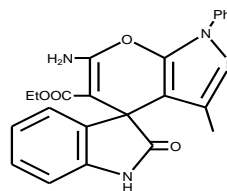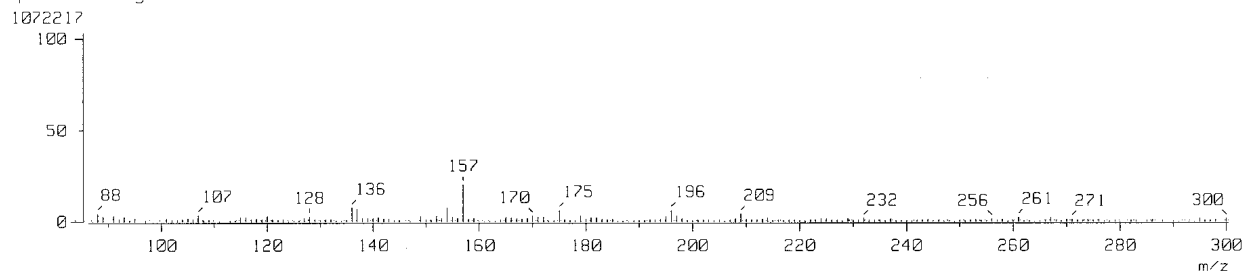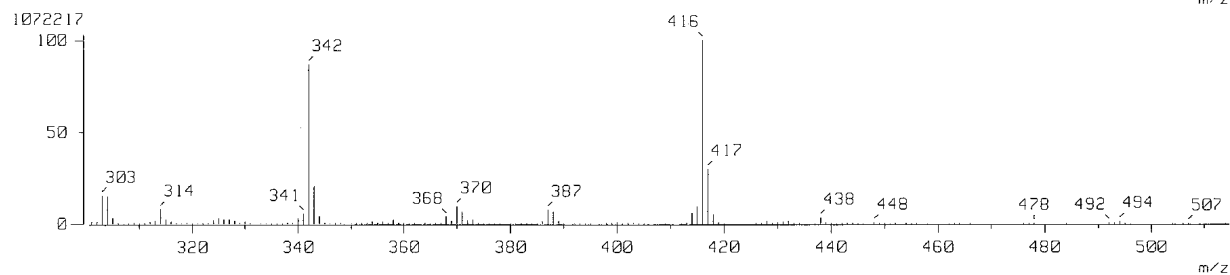

### Mass spectrum of compound **5a**

[ Mass Spectrum ]  
Data : 8E05SEPT059  
Sample: A-1 DR ANSHU DANDIA RAJ UNIV JAIPUR #3139  
Note : -  
Inlet : Direct Ion Mode : FAB+  
Spectrum Type : Normal Ion [MF-Linear]  
RT : 0.37 min Scan# : 4  
BP : m/z 322.0000 Int. : 100.00  
Output m/z range : 93.5878 to 442.1178 Cut Level : 0.00 %

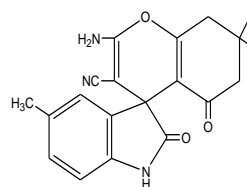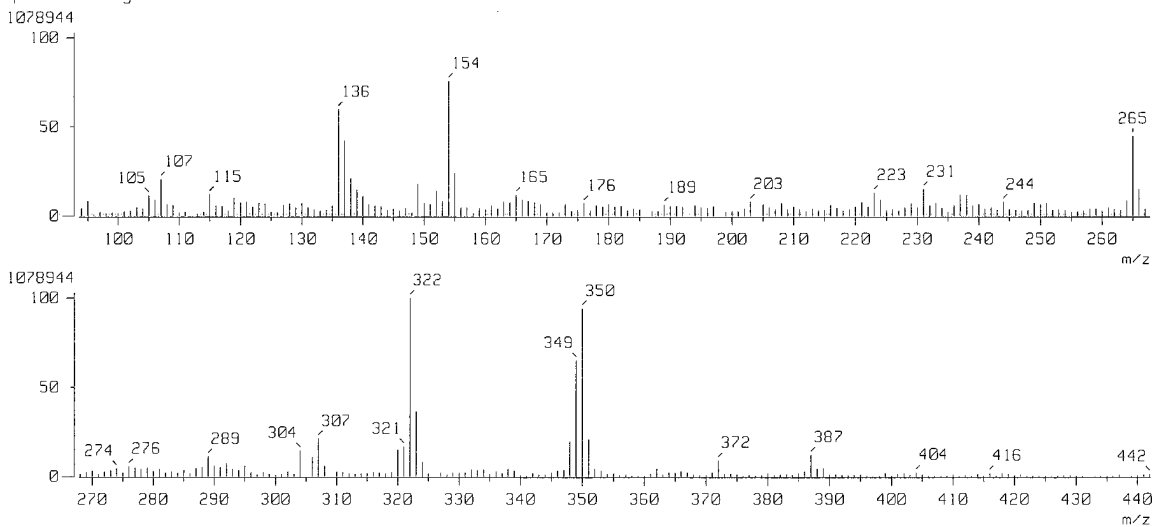

Mass spectrum of compound 7h
